# Supplementary material for: Assessing the evolutionary rate of positional orthologous genes in prokaryotes using synteny data
Source: PubMed Central journal article supplement (PMC2238764; doi:10.1186/1471-2148-7-237), 2007-11-29

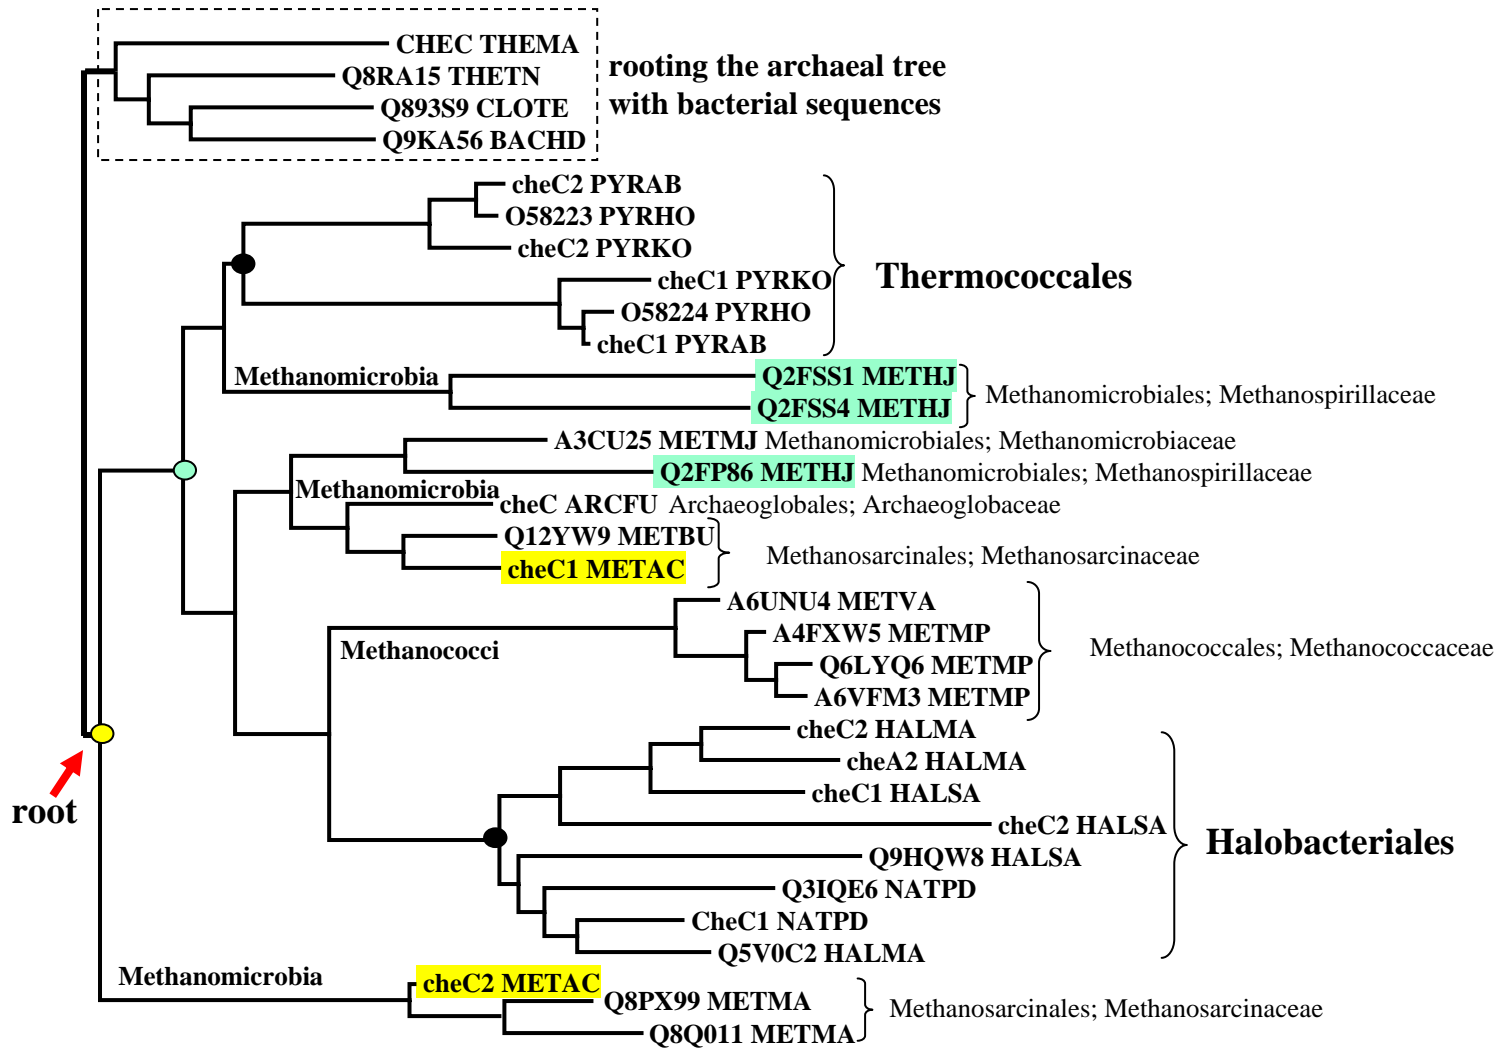

Supplement: 1471-2148-7-237-S1.pdf [file 1471-2148-7-237-S1.pdf]
