# Supplementary material for: Assessing the evolutionary rate of positional orthologous genes in prokaryotes using synteny data
Source: PubMed Central journal article supplement (PMC2238764; doi:10.1186/1471-2148-7-237), 2007-11-29
Supplement: 1471-2148-7-237-S2.pdf [file 1471-2148-7-237-S2.pdf]

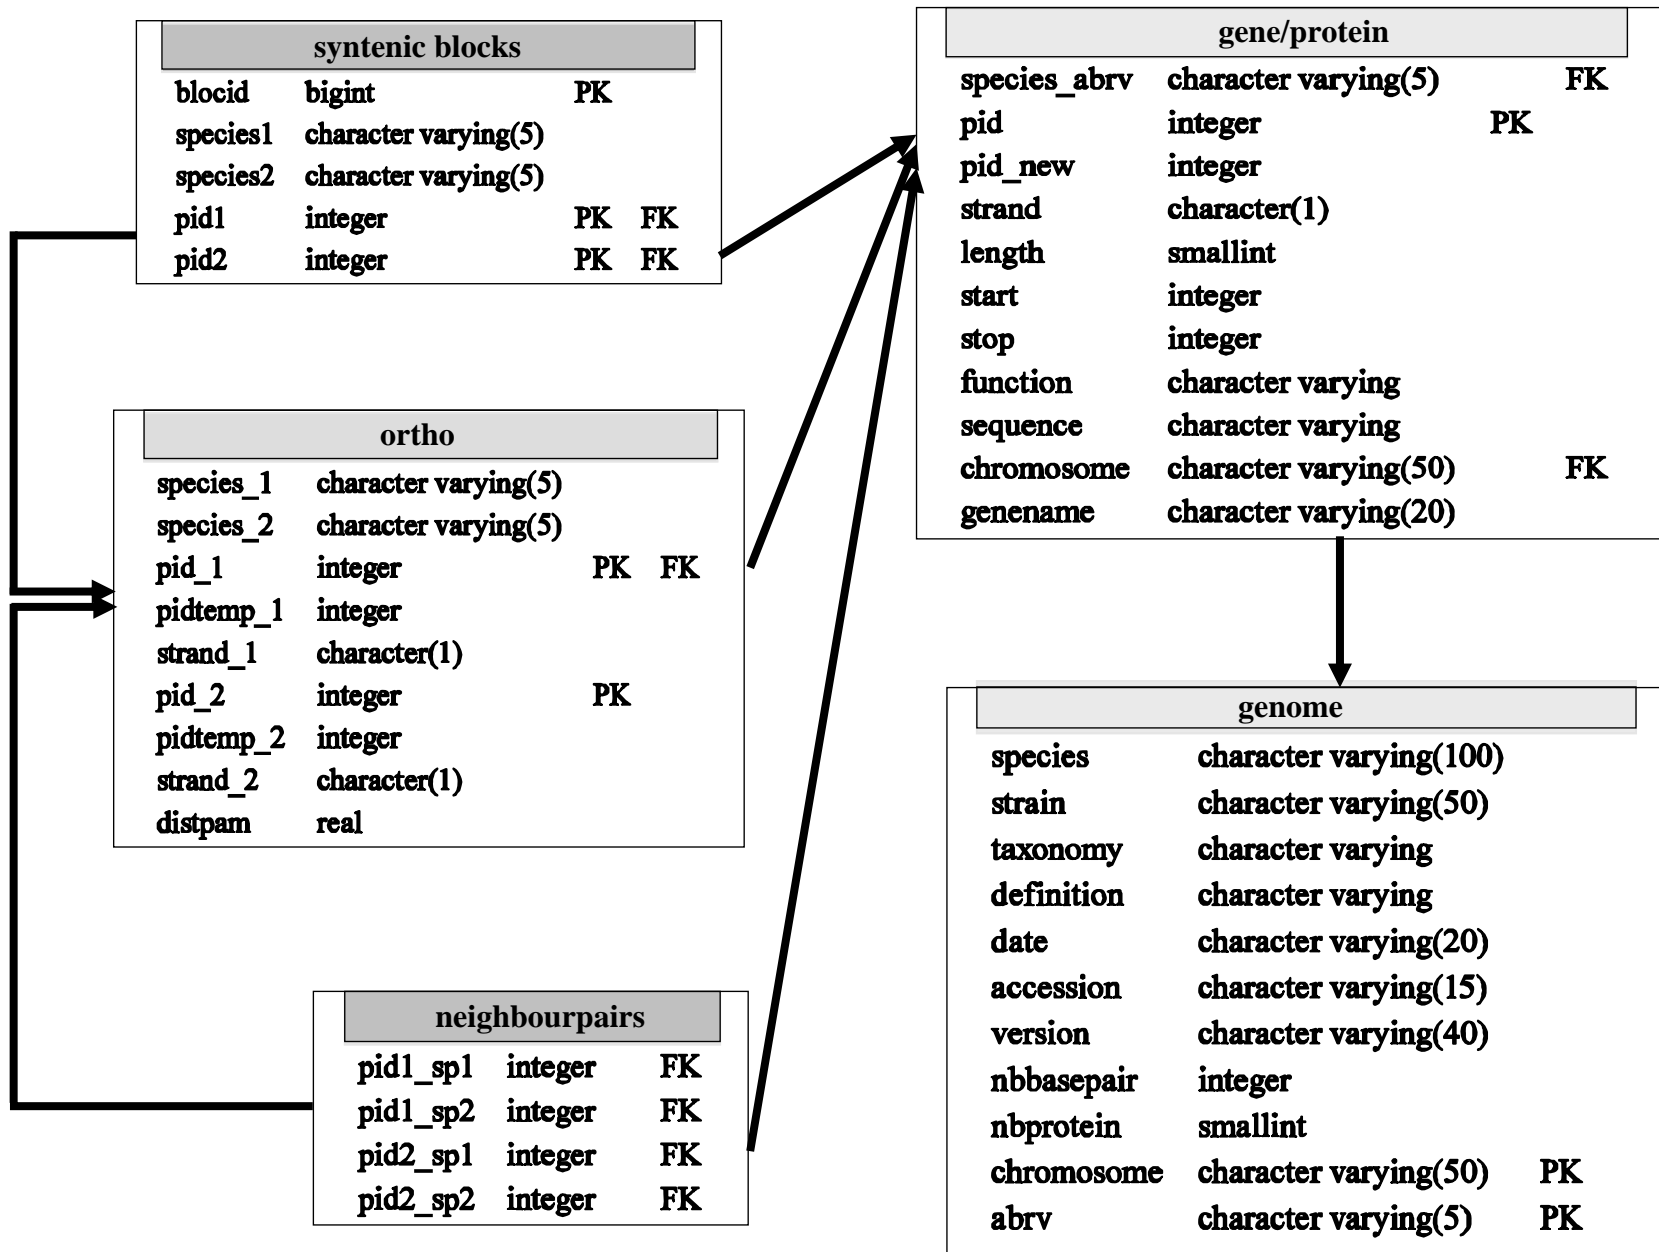

Sup\_Figure 1
