# Supplementary material for: Assessing the evolutionary rate of positional orthologous genes in prokaryotes using synteny data
Source: PubMed Central journal article supplement (PMC2238764; doi:10.1186/1471-2148-7-237), 2007-11-29
Supplement: 1471-2148-7-237-S3.pdf [file 1471-2148-7-237-S3.pdf]

## Treeortho, an algorithm to identify orthologs in evolutionary trees

```
function parcourOrtho(Node node) :
if(duplication(node)){
    foreach child (enfantsD(node)){
        parcourOrtho(child);
    }
}
else{
    children = children(node);
    // We traverse all possible pairs of children of 'node'
    for(i = 0 ; i < length(children) ; i++){
        for(j = i+1 ; j <= length(children) ; j++){
            // All the pairs of proteins are orthologous
            // Because there is no duplication
            foreach child1 ( leaves(children[$i]) ){
                foreach child2(leaves(children[$j]) ){
                    print "ortho child1-child2";
                }
            }
        }
    }
    foreach child (children){
        parcourOrtho(child);
    }
}

function duplication(Node node) :
// If the node is leaf, it's not a duplication
if(leaf(node)){
    return FALSE;
}

children = children(node);
intersect = FALSE;
// We traverse the direct children of node by pairs
for(i=0;i<length(children) && !$intersect;$i++){
    for(j=i+1;j<=length(children) && !$intersect;$j++){
        if(intersect(leaves(children[$i]),leaves(children[$j]))){
            $intersect = TRUE ;
        }
    }
}
```
