# Supplementary material for: Assessing the evolutionary rate of positional orthologous genes in prokaryotes using synteny data
Source: PubMed Central journal article supplement (PMC2238764; doi:10.1186/1471-2148-7-237), 2007-11-29
Supplement: 1471-2148-7-237-S4.pdf [file 1471-2148-7-237-S4.pdf]

| Abbv  | Domain   | phylum           | class             | Order              | family                | species name                                      |
|-------|----------|------------------|-------------------|--------------------|-----------------------|---------------------------------------------------|
| Aerpe | Archaea  | Crenarchaeota    | Thermoprotei      | Desulfurococcales  | Desulfurococcaceae    | <i>Aeropyrum pernix</i>                           |
| Sulso | Archaea  | Crenarchaeota    | Thermoprotei      | Sulfolobales       | Sulfolobaceae         | <i>Sulfolobus solfataricus</i>                    |
| Pyrae | Archaea  | Crenarchaeota    | Thermoprotei      | Thermoproteales    | Thermoproteaceae      | <i>Pyrobaculum aerophilum</i>                     |
| Arcfu | Archaea  | Euryarchaeota    | Archaeoglobi      | Archaeoglobales    | Archaeoglobaceae      | <i>Archaeoglobus fulgidus</i>                     |
| Halma | Archaea  | Euryarchaeota    | Halobacteria      | Halobacteriales    | Halobacteriaceae      | <i>Haloarcula marismortui</i>                     |
| Halob | Archaea  | Euryarchaeota    | Halobacteria      | Halobacteriales    | Halobacteriaceae      | <i>Halobacterium sp</i>                           |
| Metth | Archaea  | Euryarchaeota    | Methanobacteria   | Methanobacteriales | Methanobacteriaceae   | <i>Methanothermobacter<br/>thermautotrophicus</i> |
| Metja | Archaea  | Euryarchaeota    | Methanococci      | Methanococcales    | Methanocaldococcaceae | <i>Methanocaldococcus jannaschii</i>              |
| Metac | Archaea  | Euryarchaeota    | Methanomicrobia   | Methanosarcinales  | Methanosarcinaceae    | <i>Methanosarcina acetivorans</i>                 |
| Metka | Archaea  | Euryarchaeota    | Methanopyri       | Methanopyrales     | Methanopyraceae       | <i>Methanopyrus kandleri</i>                      |
| Theko | Archaea  | Euryarchaeota    | Thermococci       | Thermococcales     | Thermococcaceae       | <i>Thermococcus kodakarensis</i>                  |
| Pyrab | Archaea  | Euryarchaeota    | Thermococci       | Thermococcales     | Thermococcaceae       | <i>Pyrococcus abyssi</i>                          |
| Picto | Archaea  | Euryarchaeota    | Thermoplasmata    | Thermoplasmatales  | Picrophilaceae        | <i>Picrophilus torridus</i>                       |
| Theac | Archaea  | Euryarchaeota    | Thermoplasmata    | Thermoplasmatales  | Thermoplasmataceae    | <i>Thermoplasma acidophilum</i>                   |
| Naneq | Archaea  | Nanoarchaeota    | -                 | -                  | -                     | <i>Nanoarchaeum equitans</i>                      |
| Symth | Bacteria | Actinobacteria   | Actinobacteria    | -                  | -                     | <i>Symbiobacterium thermophilum</i>               |
| Trowh | Bacteria | Actinobacteria   | Actinobacteria    | Actinomycetales    | Cellulomonadaceae     | <i>Tropheryma whipplei</i>                        |
| Corgl | Bacteria | Actinobacteria   | Actinobacteria    | Actinomycetales    | Corynebacteriaceae    | <i>Corynebacterium glutamicum</i>                 |
| Leixy | Bacteria | Actinobacteria   | Actinobacteria    | Actinomycetales    | Microbacteriaceae     | <i>Leifsonia xyli</i>                             |
| Mycle | Bacteria | Actinobacteria   | Actinobacteria    | Actinomycetales    | Mycobacteriaceae      | <i>Mycobacterium leprae</i>                       |
| Myctu | Bacteria | Actinobacteria   | Actinobacteria    | Actinomycetales    | Mycobacteriaceae      | <i>Mycobacterium tuberculosis</i>                 |
| Strco | Bacteria | Actinobacteria   | Actinobacteria    | Actinomycetales    | Streptomycetaceae     | <i>Streptomyces coelicolor</i>                    |
| Biflo | Bacteria | Actinobacteria   | Actinobacteria    | Bifidobacteriales  | Bifidobacteriaceae    | <i>Bifidobacterium longum</i>                     |
| Aquae | Bacteria | Aquificae        | Aquificae         | Aquificales        | Aquificaceae          | <i>Aquifex aeolicus</i>                           |
| Bacth | Bacteria | B/C <sup>1</sup> | Bacteroides       | Bacteroidales      | Bacteroidaceae        | <i>Bacteroides thetaiotaomicron</i>               |
| Porgi | Bacteria | B/C <sup>1</sup> | Bacteroides       | Bacteroidales      | Porphyromonadaceae    | <i>Porphyromonas gingivalis</i>                   |
| Chlte | Bacteria | B/C <sup>1</sup> | Chlorobia         | Chlorobiales       | Chlorobiaceae         | <i>Chlorobium tepidum</i>                         |
| Chlmu | Bacteria | C/V <sup>2</sup> | Chlamydiae        | Chlamydiales       | Chlamydiaceae         | <i>Chlamydia muridarum</i>                        |
| Chltr | Bacteria | C/V <sup>2</sup> | Chlamydiae        | Chlamydiales       | Chlamydiaceae         | <i>Chlamydia trachomatis</i>                      |
| Chlpn | Bacteria | C/V <sup>2</sup> | Chlamydiae        | Chlamydiales       | Chlamydiaceae         | <i>Chlamydophila pneumoniae</i>                   |
| Parac | Bacteria | C/V <sup>2</sup> | Chlamydiae        | Chlamydiales       | Parachlamydiaceae     | <i>Parachlamydia species</i>                      |
| Dehet | Bacteria | Chloroflexi      | Dehalococcoidetes | -                  | -                     | <i>Dehalococcoides ethenogenes</i>                |
| Glovi | Bacteria | cyanobacteria    | -                 | Chroococcales      | -                     | <i>Gloeobacter violaceus</i>                      |
| Synec | Bacteria | cyanobacteria    | -                 | Chroococcales      | -                     | <i>Synechocystis species</i>                      |

|       |          |                     |                  |                             |                              |                                             |
|-------|----------|---------------------|------------------|-----------------------------|------------------------------|---------------------------------------------|
| Theel | Bacteria | cyanobacteria       | -                | Chroococcales               | -                            | <i>Thermosynechococcus elongatus</i>        |
| Nosto | Bacteria | cyanobacteria       | -                | Nostocales                  | Nostocaceae                  | <i>Nostoc species</i>                       |
| Proma | Bacteria | cyanobacteria       | -                | Prochlorophytes             | Prochlorococcaceae           | <i>Prochlorococcus marinus</i>              |
| PromM | Bacteria | cyanobacteria       | -                | Prochlorophytes             | Prochlorococcaceae           | <i>Prochlorococcus marinus</i>              |
| Deira | Bacteria | Deinococcus-Thermus | Deinococci       | Deinococcales               | Deinococcaceae               | <i>Deinococcus radiodurans</i>              |
| Theth | Bacteria | Deinococcus-Thermus | Deinococci       | Thermales                   | Thermaceae                   | <i>Thermus thermophilus</i>                 |
| Bacha | Bacteria | Firmicutes          | Bacilli          | Bacillales                  | Bacillaceae                  | <i>Bacillus halodurans</i>                  |
| Bacsu | Bacteria | Firmicutes          | Bacilli          | Bacillales                  | Bacillaceae                  | <i>Bacillus subtilis</i>                    |
| Oceih | Bacteria | Firmicutes          | Bacilli          | Bacillales                  | Bacillaceae                  | <i>Oceanobacillus iheyensis</i>             |
| Lisin | Bacteria | Firmicutes          | Bacilli          | Bacillales                  | Listeriaceae                 | <i>Listeria innocua</i>                     |
| Staa  | Bacteria | Firmicutes          | Bacilli          | Bacillales                  | Staphylococcaceae            | <i>Staphylococcus aureus</i>                |
| Entfa | Bacteria | Firmicutes          | Bacilli          | Lactobacillales             | Enterococcaceae              | <i>Enterococcus faecalis</i>                |
| Lacla | Bacteria | Firmicutes          | Bacilli          | Lactobacillales             | Streptococcaceae             | <i>Lactococcus lactis</i>                   |
| Strpn | Bacteria | Firmicutes          | Bacilli          | Lactobacillales             | Streptococcaceae             | <i>Streptococcus pneumoniae</i>             |
| Strpy | Bacteria | Firmicutes          | Bacilli          | Lactobacillales             | Streptococcaceae             | <i>Streptococcus pyogenes</i>               |
| Cloac | Bacteria | Firmicutes          | Clostridia       | Clostridiales               | Clostridiaceae               | <i>Clostridium acetobutylicum</i>           |
| Clote | Bacteria | Firmicutes          | Clostridia       | Clostridiales               | Clostridiaceae               | <i>Clostridium tetani</i>                   |
| The   | Bacteria | Firmicutes          | Clostridia       | Thermoanaerobacteri<br>ales | Thermoanaerobacteriac<br>eae | <i>Thermoanaerobacter<br/>tengcongensis</i> |
| Oniye | Bacteria | Firmicutes          | Mollicutes       | Acholeplasmatales           | Acholeplasmataceae           | <i>Phytolasma asteris</i>                   |
| Mycge | Bacteria | Firmicutes          | Mollicutes       | Mycoplasmatales             | Mycoplasmataceae             | <i>Mycoplasma genitalium</i>                |
| Mycpe | Bacteria | Firmicutes          | Mollicutes       | Mycoplasmatales             | Mycoplasmataceae             | <i>Mycoplasma penetrans</i>                 |
| Mycpn | Bacteria | Firmicutes          | Mollicutes       | Mycoplasmatales             | Mycoplasmataceae             | <i>Mycoplasma pneumoniae</i>                |
| Mycpu | Bacteria | Firmicutes          | Mollicutes       | Mycoplasmatales             | Mycoplasmataceae             | <i>Mycoplasma pulmonis</i>                  |
| Ureur | Bacteria | Firmicutes          | Mollicutes       | Mycoplasmatales             | Mycoplasmataceae             | <i>Ureaplasma parvum</i>                    |
| Mesfl | Bacteria | Firmicutes          | Mollicutes       | Entomoplasmatales           | Entomoplasmataceae           | <i>Mesoplasma florum</i>                    |
| Fusnu | Bacteria | Fusobacteria        | Fusobacteria     | Fusobacteriales             | Fusobacteriaceae             | <i>Fusobacterium nucleatum</i>              |
| Pirel | Bacteria | Planctomycetes      | Planctomycetacia | Planctomycetales            | Planctomycetaceae            | <i>Rhodopirellula baltica</i>               |
| Caucr | Bacteria | proteobacteria      | alpha            | Caulobacterales             | Caulobacteraceae             | <i>Caulobacter crescentus</i>               |
| Braja | Bacteria | proteobacteria      | alpha            | Rhizobiales                 | Bradyrhizobiaceae            | <i>Bradyrhizobium japonicum</i>             |
| Rhopa | Bacteria | proteobacteria      | alpha            | Rhizobiales                 | Bradyrhizobiaceae            | <i>Rhodopseudomonas palustris</i>           |
| Brume | Bacteria | proteobacteria      | alpha            | Rhizobiales                 | Brucellaceae                 | <i>Brucella melitensis</i>                  |
| Meslo | Bacteria | proteobacteria      | alpha            | Rhizobiales                 | Phyllobacteriaceae           | <i>Mesorhizobium loti</i>                   |
| Agrtu | Bacteria | proteobacteria      | alpha            | Rhizobiales                 | Rhizobiaceae                 | <i>Agrobacterium tumefaciens</i>            |
| Sinme | Bacteria | proteobacteria      | alpha            | Rhizobiales                 | Rhizobiaceae                 | <i>Sinorhizobium meliloti</i>               |
| Anama | Bacteria | proteobacteria      | alpha            | Rickettsiales               | Anaplasmataceae              | <i>Anaplasma marginale</i>                  |
| Ricco | Bacteria | proteobacteria      | alpha            | Rickettsiales               | Rickettsiaceae               | <i>Rickettsia conorii</i>                   |

|       |          |                |              |                    |                     |                                   |
|-------|----------|----------------|--------------|--------------------|---------------------|-----------------------------------|
| Ricpr | Bacteria | proteobacteria | alpha        | Rickettsiales      | Rickettsiaceae      | <i>Rickettsia prowazekii</i>      |
| Wolba | Bacteria | proteobacteria | alpha        | Rickettsiales      | Rickettsiaceae      | <i>Wolbachia pipientis</i>        |
| Zymmo | Bacteria | proteobacteria | alpha        | Sphingomonadales   | Sphingomonadaceae   | <i>Zymomonas mobilis</i>          |
| Borbr | Bacteria | proteobacteria | beta         | Burkholderiales    | Alcaligenaceae      | <i>Bordetella bronchiseptica</i>  |
| Ralso | Bacteria | proteobacteria | beta         | Burkholderiales    | Burkholderiaceae    | <i>Ralstonia solanacearum</i>     |
| Neime | Bacteria | proteobacteria | beta         | Neisseriales       | Neisseriaceae       | <i>Neisseria meningitidis</i>     |
| Niteu | Bacteria | proteobacteria | beta         | Nitrosomonadales   | Nitrosomonadaceae   | <i>Nitrosomonas europaea</i>      |
| Bdeba | Bacteria | proteobacteria | delta        | Bdellovibrionales  | Bdellovibrionaceae  | <i>Bdellovibrio bacteriovorus</i> |
| Desps | Bacteria | proteobacteria | delta        | Desulfobacterales  | Desulfobulbaceae    | <i>Desulfotalea psychrophila</i>  |
| Desvu | Bacteria | proteobacteria | delta        | Desulfovibrionales | Desulfovibrionaceae | <i>Desulfovibrio vulgaris</i>     |
| Geosu | Bacteria | proteobacteria | delta        | Desulfuromonadales | Geobacteraceae      | <i>Geobacter sulfurreducens</i>   |
| Sheon | Bacteria | proteobacteria | gamma        | Alteromonadales    | Alteromonadaceae    | <i>Shewanella oneidensis</i>      |
| Blofl | Bacteria | proteobacteria | gamma        | Enterobacteriales  | Enterobacteriaceae  | <i>Blochmannia floridanus</i>     |
| Buchn | Bacteria | proteobacteria | gamma        | Enterobacteriales  | Enterobacteriaceae  | <i>Buchnera aphidicola</i>        |
| Escco | Bacteria | proteobacteria | gamma        | Enterobacteriales  | Enterobacteriaceae  | <i>Escherichia coli</i>           |
| Salen | Bacteria | proteobacteria | gamma        | Enterobacteriales  | Enterobacteriaceae  | <i>Salmonella enterica</i>        |
| Wiggl | Bacteria | proteobacteria | gamma        | Enterobacteriales  | Enterobacteriaceae  | <i>Wigglesworthia glossinidia</i> |
| Yerpe | Bacteria | proteobacteria | gamma        | Enterobacteriales  | Enterobacteriaceae  | <i>Yersinia pestis</i>            |
| Coxbu | Bacteria | proteobacteria | gamma        | Legionellales      | Coxiellaceae        | <i>Coxiella burnetii</i>          |
| Haein | Bacteria | proteobacteria | gamma        | Pasteurellales     | Pasteurellaceae     | <i>Haemophilus influenzae</i>     |
| Pasmu | Bacteria | proteobacteria | gamma        | Pasteurellales     | Pasteurellaceae     | <i>Pasteurella multocida</i>      |
| Acine | Bacteria | proteobacteria | gamma        | Pseudomonadales    | Moraxellaceae       | <i>Acinetobacter species</i>      |
| Pseae | Bacteria | proteobacteria | gamma        | Pseudomonadales    | Pseudomonadaceae    | <i>Pseudomonas aeruginosa</i>     |
| Fratu | Bacteria | proteobacteria | gamma        | Thiotrichales      | Francisellaceae     | <i>Francisella tularensis</i>     |
| Vibch | Bacteria | proteobacteria | gamma        | Vibrionales        | Vibrionaceae        | <i>Vibrio cholerae</i>            |
| Vibpa | Bacteria | proteobacteria | gamma        | Vibrionales        | Vibrionaceae        | <i>Vibrio parahaemolyticus</i>    |
| Xanax | Bacteria | proteobacteria | gamma        | Xanthomonadales    | Xanthomonadaceae    | <i>Xanthomonas axonopodis</i>     |
| Xylfa | Bacteria | proteobacteria | gamma        | Xanthomonadales    | Xanthomonadaceae    | <i>Xylella fastidiosa</i>         |
| Camje | Bacteria | proteobacteria | epsilon      | Campylobacterales  | Campylobacteraceae  | <i>Campylobacter jejuni</i>       |
| HelpJ | Bacteria | proteobacteria | epsilon      | Campylobacterales  | Helicobacteraceae   | <i>Helicobacter pylori</i>        |
| Helpy | Bacteria | proteobacteria | epsilon      | Campylobacterales  | Helicobacteraceae   | <i>Helicobacter pylori</i>        |
| Wolsu | Bacteria | proteobacteria | epsilon      | Campylobacterales  | Helicobacteraceae   | <i>Wolinella succinogenes</i>     |
| Lepin | Bacteria | Spirochaetes   | Spirochaetes | Spirochaetales     | Leptospiraceae      | <i>Leptospira interrogans</i>     |
| Borbu | Bacteria | Spirochaetes   | Spirochaetes | Spirochaetales     | Spirochaetaceae     | <i>Borrelia burgdorferi</i>       |
| Trede | Bacteria | Spirochaetes   | Spirochaetes | Spirochaetales     | Spirochaetaceae     | <i>Treponema denticola</i>        |
| Trepa | Bacteria | Spirochaetes   | Spirochaetes | Spirochaetales     | Spirochaetaceae     | <i>Treponema pallidum</i>         |
| Thema | Bacteria | Thermotogae    | Thermotogae  | Thermotogales      | Thermotogaceae      | <i>Thermotoga maritima</i>        |

**Table 1. List of the organisms (sorted by their taxonomy) used to compare gene order and to identify all orthologs.**

<sup>1</sup>**B/C = Bacteroidetes/Chlorobi group**

<sup>2</sup>**C/V = Chlamydiae/Verrucomicrobia group**
