# Supplementary material for: Assessing the evolutionary rate of positional orthologous genes in prokaryotes using synteny data
Source: PubMed Central journal article supplement (PMC2238764; doi:10.1186/1471-2148-7-237), 2007-11-29
Supplement: 1471-2148-7-237-S5.pdf [file 1471-2148-7-237-S5.pdf]

| species | pid      | gene          | function                                        | species | pid      | gene          | function                                                      |
|---------|----------|---------------|-------------------------------------------------|---------|----------|---------------|---------------------------------------------------------------|
| Bacha   | 15614990 | <i>rpsB</i>   | 30S ribosomal protein S2                        | Bacsu   | 16078712 | <i>rpsB</i>   | ribosomal protein S2                                          |
| Bacha   | 15614989 | <i>tsf</i>    | elongation factor Ts                            | Bacsu   | 16078713 | <i>tsf</i>    | elongation factor Ts                                          |
| Bacha   | 15614988 | <i>smBA</i>   | uridylylate kinase                              | Bacsu   | 16078714 | <i>smBA</i>   | uridylylate kinase                                            |
| Bacha   | 15614987 | <i>frr</i>    | ribosome recycling factor                       | Bacsu   | 16078715 | <i>frr</i>    | ribosome recycling factor                                     |
| Bacha   | 15614986 | <i>uppS</i>   | undecaprenyl pyrophosphate synthetase           | Bacsu   | 16078716 | <i>yluA</i>   | –                                                             |
| Bacha   | 15614985 | <i>cdsA</i>   | phosphatidate cytidylyltransferase              | Bacsu   | 16078717 | <i>cdsA</i>   | phosphatidate cytidylyltransferase (CDP-diglyceride synthase) |
| Bacha   | 15614984 | <i>BH2421</i> | 1-deoxy-d-xylulose-5-phosphate reductoisomerase | Bacsu   | 16078718 | <i>yluB</i>   | –                                                             |
| Bacha   | 15614983 | <i>BH2420</i> | –                                               | Bacsu   | 16078719 | <i>yluC</i>   | –                                                             |
| Bacha   | 15614982 | <i>proS</i>   | prolyl-tRNA synthetase                          | Bacsu   | 16078720 | <i>proS</i>   | prolyl-tRNA synthetase                                        |
| Bacha   | 15614981 | <i>polC</i>   | DNA polymerase III (alpha subunit)              | Bacsu   | 16078721 | <i>polC</i>   | DNA polymerase III (alpha subunit)                            |
| Bacha   | 15614980 | <i>BH2417</i> | –                                               | Bacsu   | 16078722 | <i>ylxS</i>   | –                                                             |
| Bacha   | 15614979 | <i>nusA</i>   | transcriptional terminator                      | Bacsu   | 16078723 | <i>nusA</i>   | –                                                             |
| Bacha   | 15614978 | <i>BH2415</i> | –                                               | Bacsu   | 16078724 | <i>ylxR</i>   | –                                                             |
| Bacha   | 15614977 | <i>BH2414</i> | –                                               | Bacsu   | 16078725 | <i>ylxQ</i>   | –                                                             |
| Bacha   | 15614976 | <i>infB</i>   | translation initiation factor IF-2              | Bacsu   | 16078726 | <i>infB</i>   | initiation factor IF-2                                        |
| Bacha   | 15614975 | <i>BH2412</i> | –                                               | Bacsu   | 16078727 | <i>ylxP</i>   | –                                                             |
| Bacha   | 15614974 | <i>rbfA</i>   | ribosome-binding factor A                       | Bacsu   | 16078728 | <i>rbfA</i>   | ribosome-binding factor A                                     |
| Bacha   | 15614973 | <i>truB</i>   | tRNA pseudouridine 5S synthase                  | Bacsu   | 16078729 | <i>truB</i>   | tRNA pseudouridine 5S synthase                                |
| Bacha   | 15614972 | <i>ribC</i>   | riboflavin kinase / FAD synthase                | Bacsu   | 16078730 | <i>ribC</i>   | riboflavin kinase                                             |
| Bacha   | 15614971 | <i>rpsO</i>   | 30S ribosomal protein S15                       | Bacsu   | 16078731 | <i>rpsO</i>   | ribosomal protein S15 (BS18)                                  |
| Bacha   | 15614970 | <i>pnpA</i>   | polynucleotide phosphorylase                    | Bacsu   | 16078732 | <i>pnpA</i>   | polynucleotide phosphorylase (PNPase)                         |
| Bacha   | 15614969 | <i>BH2406</i> | –                                               | Bacsu   | 16078733 | <i>ylxY</i>   | –                                                             |
| Bacha   | 15614968 | <i>BH2405</i> | processing protease                             | Bacsu   | 16078734 | <i>ymxG</i>   | –                                                             |
| Bacha   | 15614967 | <i>BH2404</i> | –                                               | Bacsu   | 16078735 | <i>ymxH</i>   | –                                                             |
| Bacha   | 15614966 | <i>spoVFA</i> | dipicolinate synthase subunit A                 | Bacsu   | 16078736 | <i>spoVFA</i> | dipicolinate synthase subunit A                               |
| Bacha   | 15614965 | <i>spoVFB</i> | dipicolinate synthase subunit B                 | Bacsu   | 16078737 | <i>spoVFB</i> | dipicolinate synthase subunit B                               |
| Bacha   | 15614964 | <i>asd</i>    | aspartate-semialdehyde dehydrogenase            | Bacsu   | 16078738 | <i>asd</i>    | aspartate-semialdehyde dehydrogenase                          |
| Bacha   | 15614963 | <i>dapG</i>   | aspartokinase I (alpha and beta subunits)       | Bacsu   | 16078739 | <i>dapG</i>   | aspartokinase I (alpha and beta subunits)                     |
| Bacha   | 15614962 | <i>dapA</i>   | dihydrodipicolinate synthase                    | Bacsu   | 16078740 | <i>dapA</i>   | dihydrodipicolinate synthase                                  |
| Bacha   | 15614961 | <i>BH2398</i> | –                                               | Bacsu   | 16078741 | <i>ymfA</i>   | –                                                             |

**Table 2. The longest synteny block in SynteBase.**

Bacha = *Bacillus halodurans*

Bacsu = *Bacillus subtilis*
